# Supplementary material for: Origin in Acinetobacter guillouiae and Dissemination of the Aminoglycoside-Modifying Enzyme Aph(3′)-VI
Source: PubMed Central journal article supplement — mBio. 2014 Oct 21;5(5):e01972-14. doi: 10.1128/mBio.01972-14 (PMC4212838; doi:10.1128/mbio.01972-14), 2014-10-21
Supplement: mbo005142024sf1.pdf [file mbo005142024sf1.pdf]

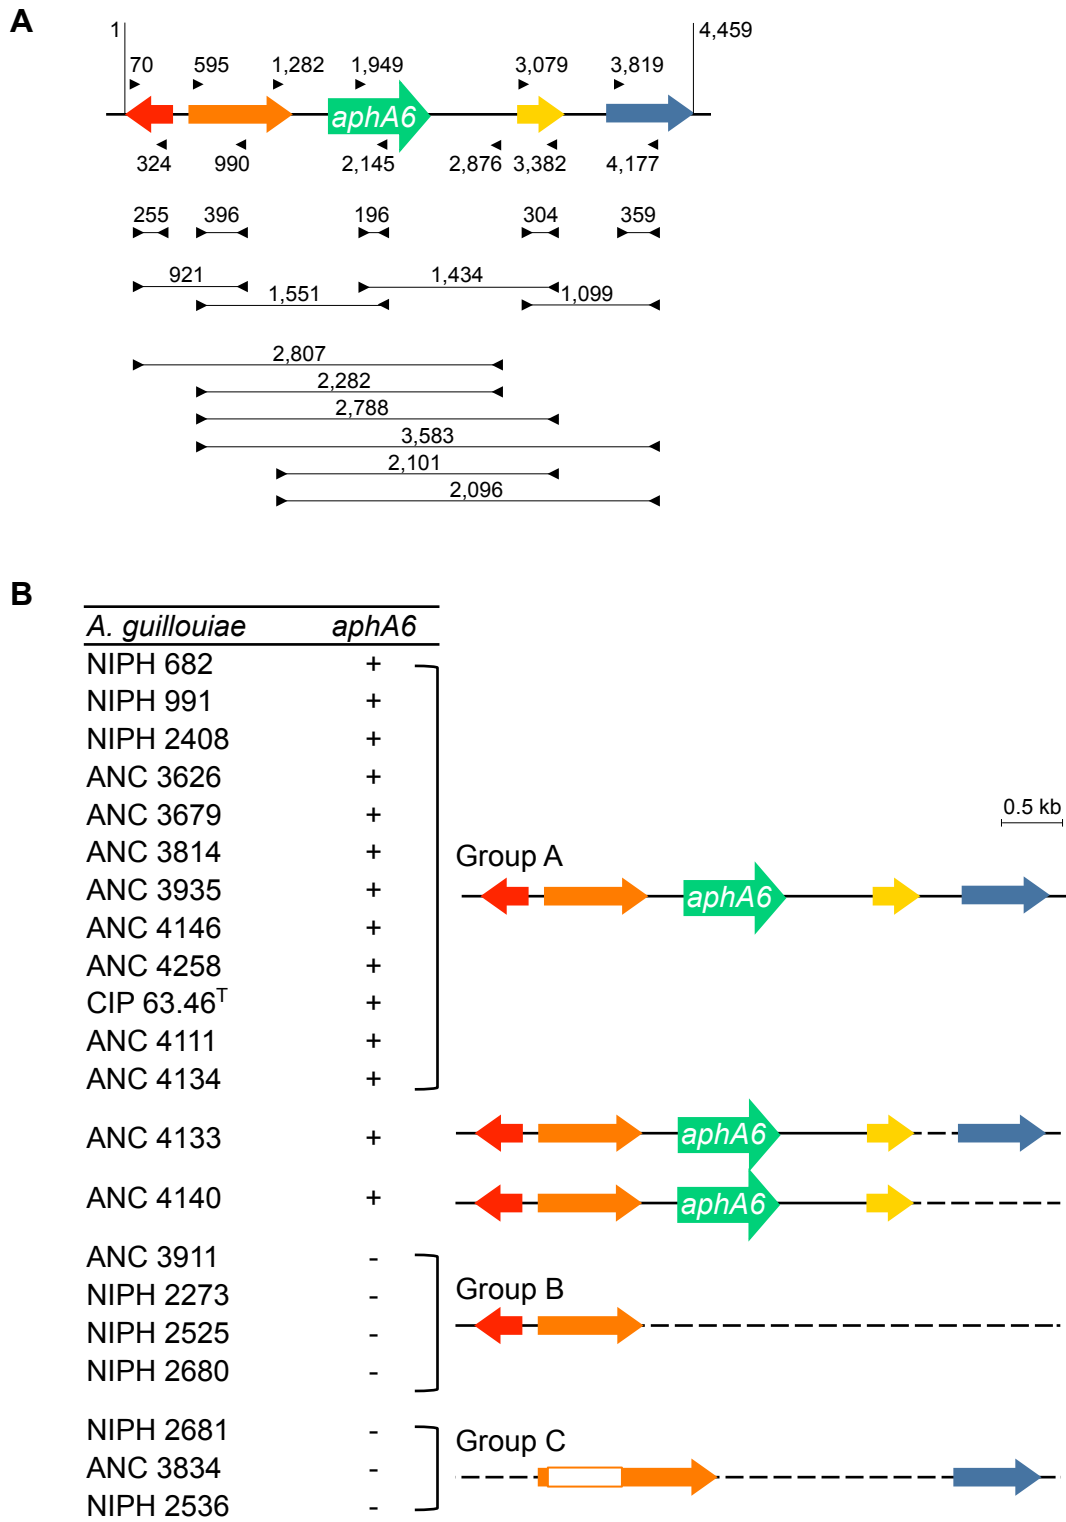

**FIG S1** Genomic context of *aphA6* in *A. guillouiae* strains. A. Map of the 4,459-bp region containing the *aphA6* gene in *A. guillouiae* NIPH 991 and CIP 63.46<sup>T</sup>. Open arrows represent coding sequences and direction of transcription. Arrowheads indicate the 5'end position and orientation of the primers (see Table S2). Horizontal lines depict the PCR products corresponding to overlapping amplified fragments. Numbering starts from the end of the ORF 1,591 bp upstream from the *aphA6* gene. The size of the PCR products is indicated. B. PCR mapping of *A. guillouiae* strains. +, presence; -, absence; ---, not detected.
