# Supplementary material for: Origin in Acinetobacter guillouiae and Dissemination of the Aminoglycoside-Modifying Enzyme Aph(3′)-VI
Source: PubMed Central journal article supplement — mBio. 2014 Oct 21;5(5):e01972-14. doi: 10.1128/mBio.01972-14 (PMC4212838; doi:10.1128/mbio.01972-14), 2014-10-21
Supplement: mbo005142024sf2.pdf [file mbo005142024sf2.pdf]

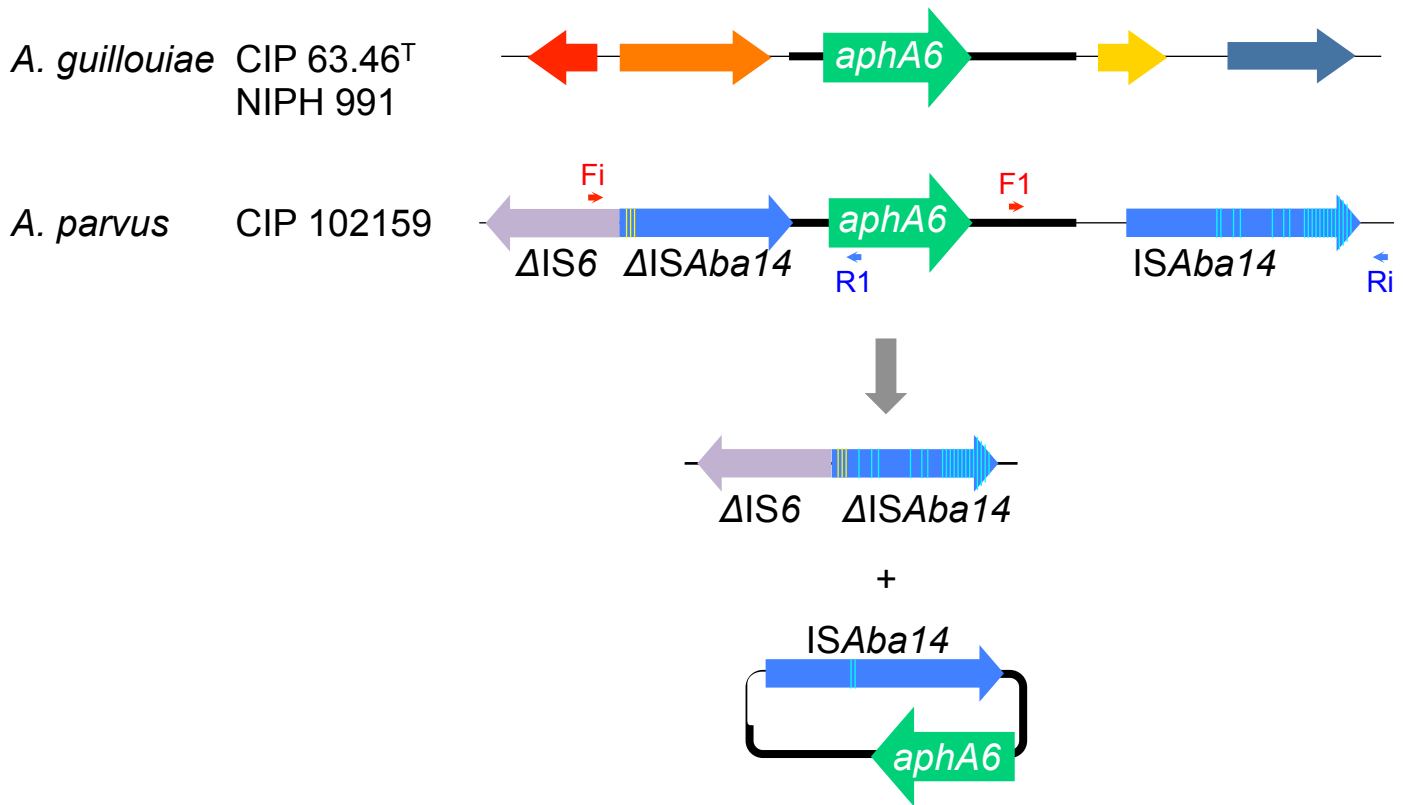

**FIG S2** Genomic environment and excision of *aphA6* in *A. parvus* CIP 102159. Arrows indicate open reading frames and sens of transcription. Colored arrows, ORFs; green arrow, *aphA6*; blue arrow, *ISAbA14*; purple arrow,  $\Delta IS6$ ; thick black line, identity between *A. guillouiae* and *A. parvus* strains; Vertical bars in *ISAbA14*, base substitutions; *Fi*, 102159-*Fi*; *Ri*, 102159-*Ri*; *F1*, 102159-*F1*; and *R1*, 102159-*R1*, PCR primers.
