# Supplementary material for: Origin in Acinetobacter guillouiae and Dissemination of the Aminoglycoside-Modifying Enzyme Aph(3′)-VI
Source: PubMed Central journal article supplement — mBio. 2014 Oct 21;5(5):e01972-14. doi: 10.1128/mBio.01972-14 (PMC4212838; doi:10.1128/mbio.01972-14), 2014-10-21
Supplement: mbo005142024sf5.pdf [file mbo005142024sf5.pdf]

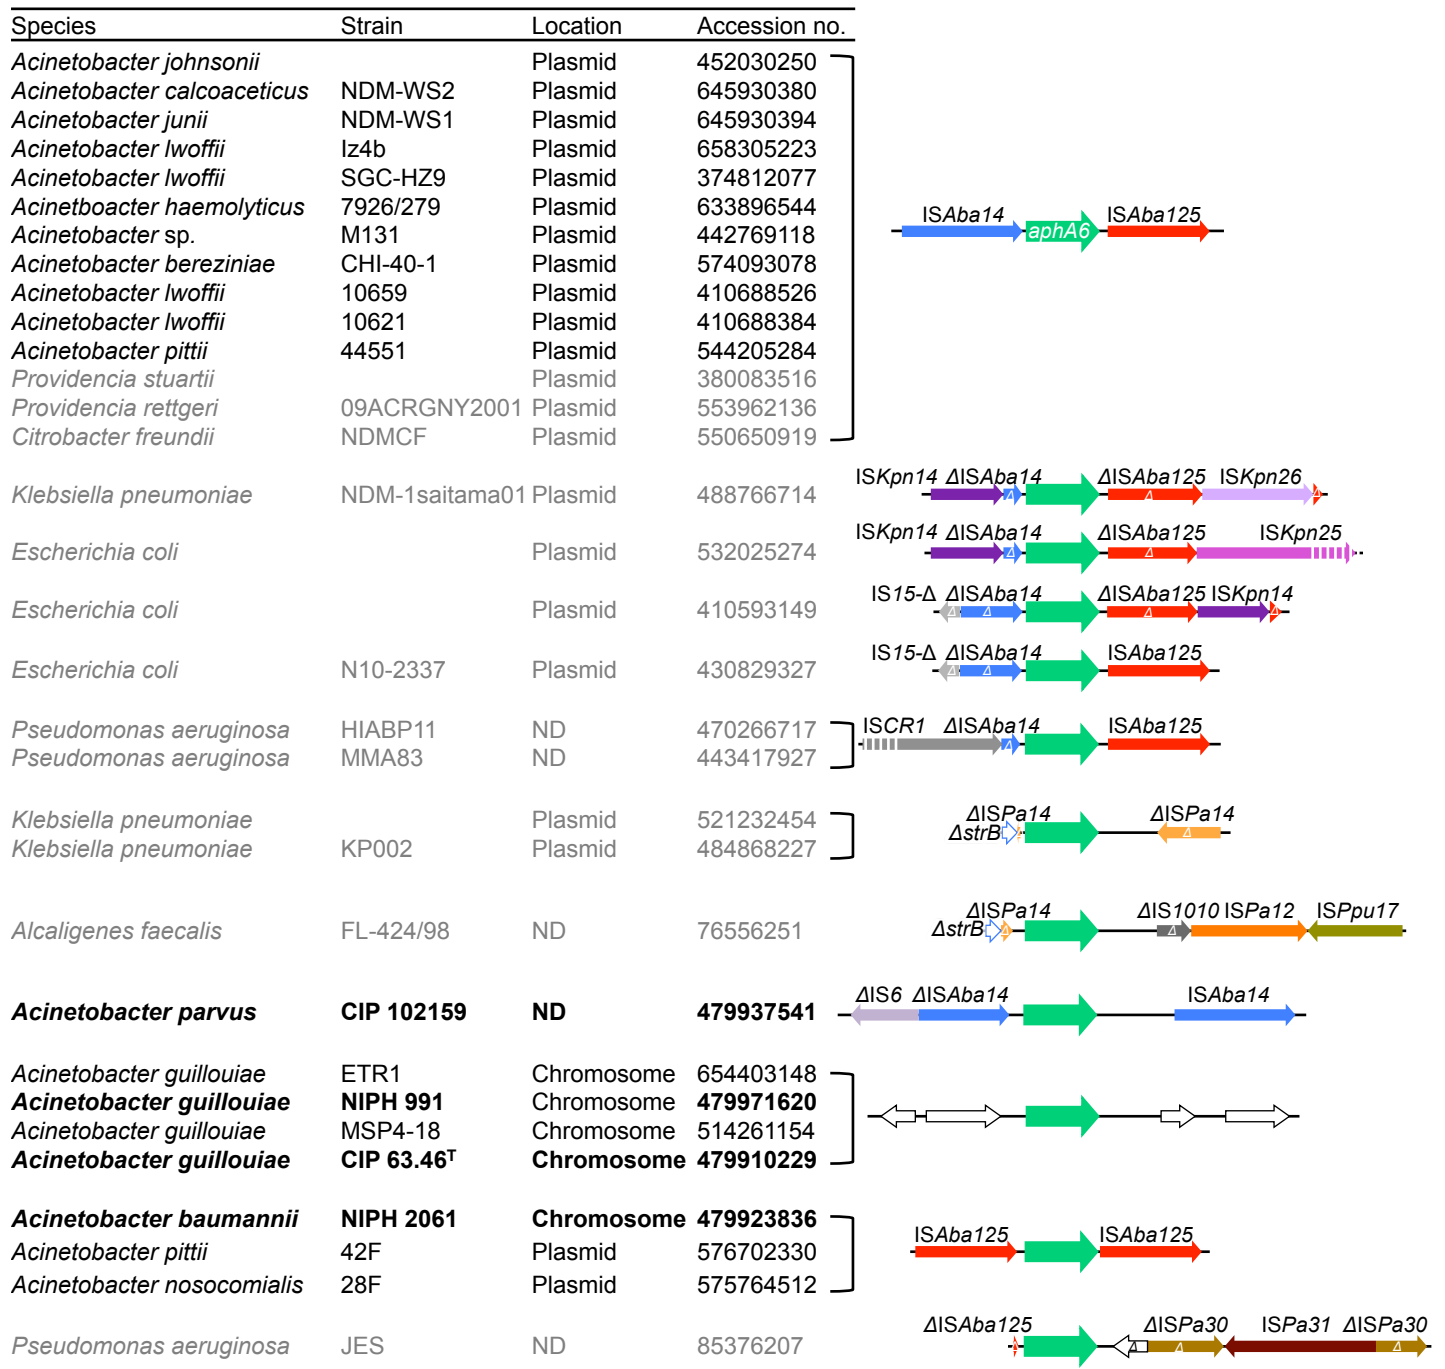

**FIG S5** Genomic environment of *aphA6*. Left : Black, *Acinetobacter* spp.; grey, *Enterobacteriaceae*, *P. aeruginosa*, and *Alcaligenes faecalis*; bold, strains for which whole genome was sequenced; ND, not determined. Right : Arrows indicate open reading frames and sens of transcription. Green arrow, *aphA6*; other colored arrows, IS elements; open arrows, ORFs; Δ, partially deleted.
